# Supplementary material for: Association of SNCA Parkinson's Disease Risk Polymorphisms With Disease Progression in Newly Diagnosed Patients
Source: PubMed Central journal article supplement (PMC7902914; doi:10.3389/fneur.2020.620585), 2021-02-10
Supplement: Data_Sheet_1.pdf [file Data_Sheet_1.pdf]

## Supplementary materials

**Table S1** *SNCA* variants included in the study.

| SNP       | Location <sup>a</sup> | M/m | M/M | NC  |     |     | PD  |     |      | NC   | PD |
|-----------|-----------------------|-----|-----|-----|-----|-----|-----|-----|------|------|----|
|           |                       |     |     | M/m | m/m | M/M | M/m | m/m | MAF  | MAF  |    |
| rs2870004 | 89550094              | A/t | 258 | 139 | 18  | 275 | 136 | 21  | 0.21 | 0.21 |    |
| rs356182  | 89704960              | A/g | 172 | 189 | 53  | 151 | 212 | 70  | 0.36 | 0.41 |    |
| rs5019538 | 89715479              | A/g | 199 | 172 | 44  | 193 | 189 | 50  | 0.31 | 0.33 |    |
| rs356219  | 89716450              | A/g | 155 | 200 | 61  | 141 | 213 | 79  | 0.39 | 0.43 |    |
| rs763443  | 89898810              | C/t | 105 | 212 | 99  | 122 | 209 | 101 | 0.49 | 0.48 |    |

SNP, single nucleotide polymorphism; M, major allele; m, minor allele; MAF, minor allele frequency; NC, normal control; PD, Parkinson's disease.

<sup>a</sup> Chromosome 4 location based on SNPdb data base, GRCh38.p12 genome assembly.

**Table S2** Baseline characteristics of PD patients included in the study. Genotypes grouped according to a recessive genetic model.

| Variable <sup>a</sup>              | rs2870004          |                    | rs356182     |              | rs5019538    |              | rs356219          |                    | rs763443     |              |
|------------------------------------|--------------------|--------------------|--------------|--------------|--------------|--------------|-------------------|--------------------|--------------|--------------|
|                                    | AA + AT            | TT                 | AA + AG      | GG           | AA + AG      | GG           | AA + AG           | GG                 | CC + CT      | TT           |
| Total, N (%)                       | 411 (95.1)         | 21 (4.9)           | 363 (83.8)   | 70 (16.2)    | 382 (88.4)   | 50 (11.6)    | 354 (81.8)        | 79 (18.2)          | 331 (76.6)   | 101 (23.4)   |
| Male, N (%)                        | 246 (59.9)         | 16 (76.2)          | 223 (61.4)   | 40 (57.1)    | 234 (61.3)   | 28 (56.0)    | 215 (60.7)        | 48 (60.8)          | 202 (61.0)   | 60 (59.4)    |
| Age at baseline, years             | 70.0 (±9.6)        | 68.5 (±10.3)       | 69.9 (±9.1)  | 70.2 (±11.7) | 70.0 (±9.5)  | 69.5 (±10.5) | 70.0 (±9.4)       | 69.7 (±10.6)       | 69.7 (±9.8)  | 70.7 (±9.1)  |
| Age at first motor symptoms, years | 68.0 (±9.5)        | 66.2 (±10.2)       | 67.8 (±9.1)  | 68.3 (±11.8) | 67.9 (±9.5)  | 67.9 (±10.4) | 67.9 (±9.3)       | 67.7 (±10.6)       | 68.0 (±9.5)  | 66.2 (±10.2) |
| Family history, N (%)              | 55 (13.4)          | 1 (4.8)            | 44 (12.2)    | 12 (17.1)    | 48 (12.6)    | 8 (16.0)     | 43 (12.2)         | 13 (10.2)          | 42 (12.7)    | 14 (13.9)    |
| Education, years                   | <b>11.1 (±3.5)</b> | <b>13.2 (±4.4)</b> | 11.2 (±3.5)  | 11.5 (±3.8)  | 11.2 (±3.5)  | 11.5 (±4.0)  | 11.2 (±3.5)       | 11.3 (±3.8)        | 11.2 (±3.5)  | 11.1 (±3.8)  |
| UPDRS II                           | 9.2 (±4.9)         | 9.5 (±3.6)         | 9.1 (±4.7)   | 10.0 (±5.4)  | 9.2 (4.9)    | 9.5 (±4.4)   | <b>9.0 (±4.7)</b> | <b>10.4 (±5.4)</b> | 9.3 (±5.0)   | 8.9 (±4.3)   |
| UPDRS III                          | 24.7 (±11.5)       | 24.7 (±11.4)       | 24.6 (±11.3) | 25.4 (±12.4) | 24.9 (±11.4) | 23.4 (±11.7) | 24.4 (±11.1)      | 25.9 (±12.8)       | 24.7 (±11.8) | 24.7 (±10.4) |
| Hoehn and Yahr                     | 2.1 (±0.7)         | 2.0 (±0.6)         | 2.1 (±0.7)   | 2.1 (±0.8)   | 2.1 (±0.7)   | 2.0 (±0.7)   | 2.1 (±0.7)        | 2.1 (±0.8)         | 2.1 (±0.7)   | 2.1 (±0.7)   |
| MMSE score                         | 28.1 (±2.1)        | 28.7 (±1.2)        | 28.2 (±2.1)  | 28.0 (±2.2)  | 28.1 (±2.1)  | 28.2 (±2.0)  | 28.1 (±2.1)       | 28.2 (±2.1)        | 28.1 (±2.1)  | 28.4 (±1.9)  |
| <i>UPDRS sub-scores</i>            |                    |                    |              |              |              |              |                   |                    |              |              |
| Tremor                             | 3.4 (±2.9)         | 3.1 (±3.1)         | 3.3 (±2.8)   | 3.7 (±3.2)   | 3.4 (±2.8)   | 3.5 (±3.2)   | 3.3 (±2.8)        | 3.6 (±3.3)         | 3.4 (2.9)    | 3.3 (±2.9)   |
| Rigidity                           | 4.8 (±3.4)         | 4.9 (±3.5)         | 4.8 (±3.4)   | 4.7 (±3.4)   | 4.9 (±3.4)   | 4.1 (±3.2)   | 4.8 (±3.4)        | 4.8 (3.5)          | 4.7 (±3.5)   | 4.9 (±3.1)   |
| Bradykinesia                       | 11.4 (±6.0)        | 11.3 (±6.4)        | 11.4 (±5.9)  | 11.3 (±6.3)  | 11.4 (±5.9)  | 11.0 (±6.5)  | 11.3 (±5.9)       | 11.7 (±6.5)        | 11.3 (±6.1)  | 11.5 (±5.7)  |
| Axial impairment                   | 3.0 (±2.6)         | 3.1 (±2.1)         | 2.9 (±2.6)   | 3.2 (±2.7)   | 3.0 (±2.6)   | 2.7 (±2.2)   | 2.9 (±2.6)        | 3.2 (±2.7)         | 3.0 (±2.7)   | 2.9 (±2.3)   |

N, count; UPDRS, Unified Parkinson's Disease Rating Scale; MMSE, Mini Mental State Examination.

Values presented as mean (± standard deviation) unless stated otherwise.

Groups comparisons with significant  $p$ -values ( $p < 0.05$ ) indicated in bold. P-values calculated using  $\chi^2$  tests, Mann-Whitney U or linear regression, as outlined in the methods.

<sup>a</sup> Missing data for: family history, 1; UPDRS II, 4; MMSE, 76.

**Table S3** Baseline characteristics of PD patients included in the study. Genotypes grouped according to a dominant genetic model.

| Variable <sup>a</sup>              | rs2870004    |              | rs356182     |              | rs5019538    |              | rs356219     |              | rs763443     |              |
|------------------------------------|--------------|--------------|--------------|--------------|--------------|--------------|--------------|--------------|--------------|--------------|
|                                    | AA           | AT + TT      | AA           | AG + GG      | AA           | AG + GG      | AA           | AG + GG      | CC           | CT + TT      |
| Total, N (%)                       | 275 (63.7)   | 157 (36.6)   | 151 (34.9)   | 282 (65.1)   | 193 (44.7)   | 239 (55.3)   | 141 (32.6)   | 292 (67.4)   | 122 (28.2)   | 310 (71.8)   |
| Male, N (%)                        | 164 (59.6)   | 98 (62.4)    | 82 (54.3)    | 181 (64.2)   | 111 (57.5)   | 151 (63.2)   | 78 (55.3)    | 185 (63.4)   | 73 (59.8)    | 189 (61.0)   |
| Age at baseline, years             | 70.1 (±9.8)  | 69.7 (±9.2)  | 69.5 (±9.6)  | 70.2 (±9.6)  | 69.6 (±9.1)  | 70.2 (±10.0) | 69.4 (±9.2)  | 70.2 (9.8)   | 69.0 (±10.3) | 70.3 (±9.3)  |
| Age at first motor symptoms, years | 68.0 (±9.8)  | 67.7 (±9.2)  | 67.5 (±9.6)  | 68.1 (±9.6)  | 67.6 (±9.1)  | 68.1 (±10.0) | 67.4 (±9.2)  | 68.1 (±9.8)  | 67.0 (±10.3) | 68.3 (±9.3)  |
| Positive family history, N (%)     | 37 (13.5)    | 19 (12.2)    | 14 (9.3)     | 42 (14.9)    | 23 (12.0)    | 33 (13.8)    | 15 (10.7)    | 41 (14.0)    | 14 (11.5)    | 42 (13.6)    |
| Education, years                   | 11.2 (±3.5)  | 11.2 (±3.6)  | 11.3 (±3.4)  | 11.2 (±3.6)  | 11.6 (±3.7)  | 10.9 (±3.4)  | 11.6 (±3.6)  | 11.1 (±3.6)  | 11.6 (±3.8)  | 11.1 (±3.4)  |
| UPDRS II                           | 9.4 (±4.9)   | 8.9 (±4.7)   | 9.1 (±4.9)   | 9.3 (±4.8)   | 9.2 (±4.8)   | 9.2 (±4.9)   | 9.1 (±4.8)   | 9.3 (±4.8)   | 9.7 (±4.4)   | 9.0 (±5.0)   |
| UPDRS III                          | 25.1 (±11.6) | 24.0 (±11.1) | 23.9 (±11.8) | 25.1 (±11.2) | 23.8 (±10.9) | 25.4 (±11.8) | 24.2 (±11.5) | 24.9 (±11.4) | 24.9 (±11.4) | 24.6 (±11.5) |
| Hoehn and Yahr                     | 2.1 (±0.7)   | 2.1 (±0.7)   | 2.1 (±0.7)   | 2.1 (±0.7)   | 2.1 (±0.7)   | 2.1 (±0.7)   | 2.1 (±0.7)   | 2.1 (±0.7)   | 2.1 (±0.7)   | 2.1 (±0.7)   |
| MMSE score                         | 28.1 (±2.0)  | 28.1 (±2.1)  | 28.3 (±1.8)  | 28.1 (±2.2)  | 28.2 (±2.0)  | 28.1 (±2.2)  | 28.4 (±1.7)  | 28.0 (±2.2)  | 28.1 (±1.9)  | 28.2 (±2.1)  |
| <i>UPDRS sub-scores</i>            |              |              |              |              |              |              |              |              |              |              |
| Tremor                             | 3.5 (±2.8)   | 3.3 (±3.0)   | 3.3 (±2.6)   | 3.4 (±3.0)   | 3.2 (±2.7)   | 3.5 (±3.0)   | 3.2 (±2.5)   | 3.5 (±3.0)   | 3.4 (±2.9)   | 3.4 (±2.9)   |
| Rigidity                           | 4.8 (±3.4)   | 4.7 (±3.3)   | 4.7 (±3.4)   | 4.8 (±3.4)   | 4.6 (±3.3)   | 4.9 (±3.5)   | 4.7 (±3.5)   | 4.8 (±3.3)   | 4.8 (±3.4)   | 4.8 (±3.4)   |
| Bradykinesia                       | 11.6 (±6.1)  | 10.9 (±5.9)  | 11.1 (±6.1)  | 11.5 (±5.9)  | 11.0 (±5.7)  | 11.6 (±6.2)  | 11.4 (±5.9)  | 11.4 (±6.1)  | 11.3 (±6.0)  | 11.4 (±6.0)  |
| Axial impairment                   | 3.0 (±2.6)   | 2.8 (±2.5)   | 2.8 (±2.6)   | 3.0 (±2.5)   | 2.8 (±2.7)   | 3.1 (±2.5)   | 2.8 (±2.6)   | 3.0 (±2.6)   | 3.0 (±2.8)   | 2.9 (±2.5)   |

N, count; UPDRS, Unified Parkinson's Disease Rating Scale; MMSE, Mini Mental State Examination.

Values presented as mean ( $\pm$  standard deviation) unless stated otherwise.

Groups comparisons with significant  $p$ -values ( $p < 0.05$ ) indicated in bold. P-values calculated using  $\chi^2$  tests, Mann-Whitney U, or linear regression, as outlined in the methods.

<sup>a</sup>Missing data for: family history, 1; UPDRS II, 4; MMSE, 76.

**Table S4** The association between annual change in clinical assessments of PD and *SNCA* polymorphisms assuming a dominant model.

|                              | <b>rs2870004<sup>a</sup></b><br>AA versus AT + TT |          | <b>rs356182<sup>a</sup></b><br>AA versus AG + GG |          | <b>rs5019538<sup>a</sup></b><br>AA versus AG + GG |          | <b>rs356219<sup>a</sup></b><br>AA versus AG + GG |          | <b>rs763443<sup>a</sup></b><br>CC versus CT + TT |          |
|------------------------------|---------------------------------------------------|----------|--------------------------------------------------|----------|---------------------------------------------------|----------|--------------------------------------------------|----------|--------------------------------------------------|----------|
|                              | <b>β (95% CI)</b>                                 | <b>p</b> | <b>β (95% CI)</b>                                | <b>p</b> | <b>β (95% CI)</b>                                 | <b>p</b> | <b>β (95% CI)</b>                                | <b>p</b> | <b>β (95% CI)</b>                                | <b>p</b> |
| <b>UPDRS II<sup>b</sup></b>  |                                                   |          |                                                  |          |                                                   |          |                                                  |          |                                                  |          |
| Main effect                  | 0.64 (-0.50; 1.78)                                | 0.27     | 0.13 (-1.02; 1.28)                               | 0.83     | 0.01 (-1.09; 1.11)                                | 0.96     | 0.00 (-1.17; 1.17)                               | 1.00     | 0.94 (-0.28; 2.15)                               | 0.13     |
| Interaction with time        | -0.12 (-0.32; 0.07)                               | 0.22     | -0.10 (-0.30; 0.10)                              | 0.32     | -0.09 (-0.28; 0.10)                               | 0.36     | -0.11 (-0.31; 0.09)                              | 0.27     | -0.16 (-0.37; 0.05)                              | 0.14     |
| <b>UPDRS III<sup>b</sup></b> |                                                   |          |                                                  |          |                                                   |          |                                                  |          |                                                  |          |
| Main effect                  | 1.03 (-1.25; 3.30)                                | 0.38     | -0.20 (-2.49; 2.10)                              | 0.87     | -1.20 (-3.40; 1.00)                               | 0.29     | 0.04 (-2.30; 2.38)                               | 0.97     | 0.84 (-1.59; 3.27)                               | 0.50     |
| Interaction with time        | -0.14 (-0.50; 0.22)                               | 0.44     | 0.10 (-0.27; 0.47)                               | 0.60     | 0.09 (-0.26; 0.44)                                | 0.62     | -0.07 (-0.44; 0.30)                              | 0.71     | -0.01 (-0.39; 0.38)                              | 0.98     |
| <b>MMSE<sup>c</sup></b>      |                                                   |          |                                                  |          |                                                   |          |                                                  |          |                                                  |          |
| Main effect                  | 0.00 (-0.14; 0.13)                                | 0.95     | -0.06 (-0.20; 0.08)                              | 0.37     | -0.01 (-0.14; 0.12)                               | 0.89     | -0.07 (-0.21; 0.07)                              | 0.34     | 0.06 (-0.08; 0.21)                               | 0.40     |
| Interaction with time        | 0.00 (-0.02; 0.02)                                | 0.82     | 0.01 (-0.02; 0.03)                               | 0.60     | 0.00 (-0.02; 0.02)                                | 0.90     | 0.01 (-0.02; 0.03)                               | 0.57     | 0.00 (-0.02; 0.02)                               | 0.90     |

UPDRS, Unified Parkinson's Disease Rating Scale Part; MMSE, Mini Mental State Examination; CI, confidence intervals.

The main effect indicates the effect of carrier status on the intercept and the interaction with time indicates the effect of carrier status on the slope (change in value per year) of the model.

<sup>a</sup> Genotypes grouped according to a dominant genetic model and the association with change in clinical assessments assessed using linear mixed models. The reference group is indicated in bold.

<sup>b</sup> Adjusted for study cohort, sex, age at baseline, duration of motor symptoms at baseline.

<sup>c</sup> Adjusted for study cohort, sex, age at baseline, duration of motor symptoms at baseline and years of education at baseline. MMSE score transformed before analysis.
